# Supplementary material
Source: MDPI journal article supplement (https://www.mdpi.com/2072-4292/13/8/1544)
Supplement: s1 [file s1]

## Supplementary Materials:

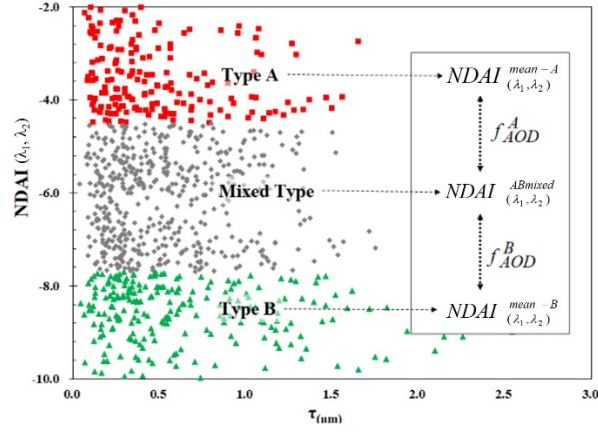

**Figure S1.** Schematic of AOD fractions ( $f_{AOD}$ ) for dual-type aerosols (type A and B) based on NDAI values which defined by the normalized 1st-order derivative of spectral AOD in this study.

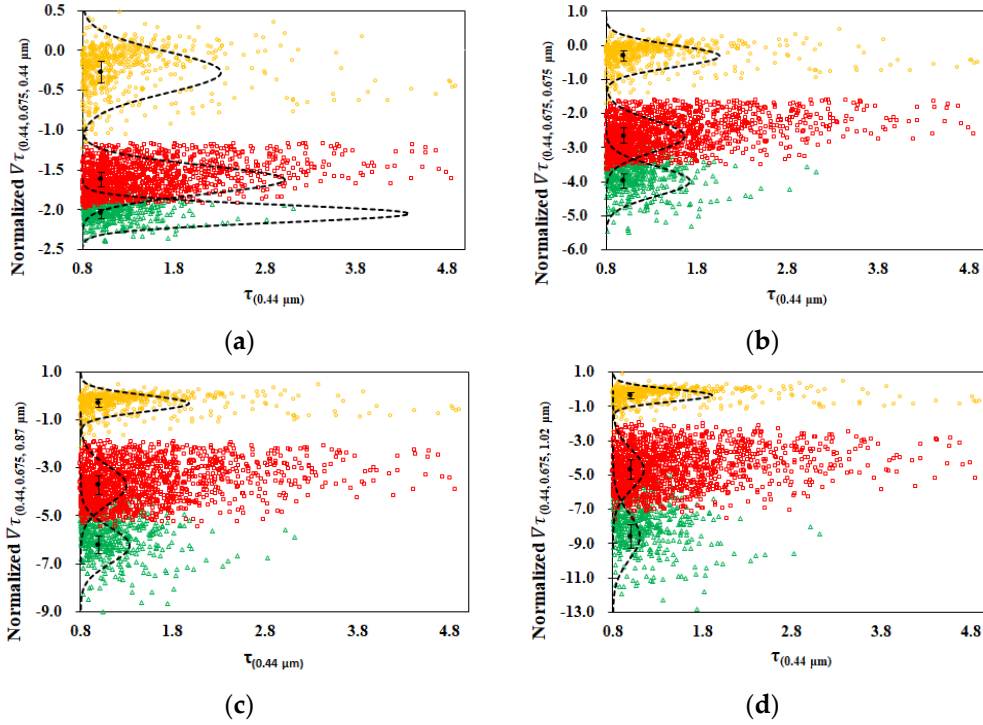

**Figure S2.** The 1st-order derivative of spectral AOD ( $\nabla\tau$ ) between 0.44  $\mu\text{m}$  and 0.675  $\mu\text{m}$ , using normalization reference of (a)  $AOD_{0.44\mu\text{m}}$ , (b)  $AOD_{0.675\mu\text{m}}$ , (c)  $AOD_{0.87\mu\text{m}}$  and (d)  $AOD_{1.02\mu\text{m}}$  for DS (yellow), BB (green) and AP (red) aerosols against  $AOD_{0.44\mu\text{m}}$ . Based on the control dataset of AERONET measurements, the dashed lines indicate mappings with normal distribution and black dot for mean values.
